# Supplementary material for: Introduction of defects in hexagonal boron nitride for vacancy-based 2D memristors
Source: Royal Society of Chemistry journal article supplement (doi:10.1039/d2nr07234c), 2023-01-01
Supplement: d2nr07234c1.pdf [file d2nr07234c1.pdf]

Electronic Supplementary Material (ESI) for Nanoscale.

This journal is © The Royal Society of Chemistry 2022

## **Introduction of defects in hexagonal boron nitride for vacancy-based 2D memristors**

Haohan Chen,<sup>a,b</sup> Yu Kang,<sup>b</sup> Dong Pu,<sup>b</sup> Ming Tian,<sup>c</sup> Neng Wan,<sup>c</sup> Yang Xu,<sup>b</sup> Bin Yu,<sup>b</sup> Wenjing Jie<sup>a\*</sup> and Yuda Zhao<sup>b\*</sup>

<sup>a</sup> *College of Chemistry and Materials Science, Sichuan Normal University, Chengdu, 610066, China.*

<sup>b</sup> *School of Micro–Nano Electronics, Hangzhou Global Scientific and Technological Innovation Centre, Zhejiang University, 38 Zheda Road, Hangzhou 310027, China*

<sup>c</sup> *Key Laboratory of MEMS of Ministry of Education, School of Electronics Science and Engineering, Southeast University, Nanjing 210096, China*

### **Corresponding Author**

\*E-mail: [wenjing.jie@sicnu.edu.cn](mailto:wenjing.jie@sicnu.edu.cn), [yudazhao@zju.edu.cn](mailto:yudazhao@zju.edu.cn)

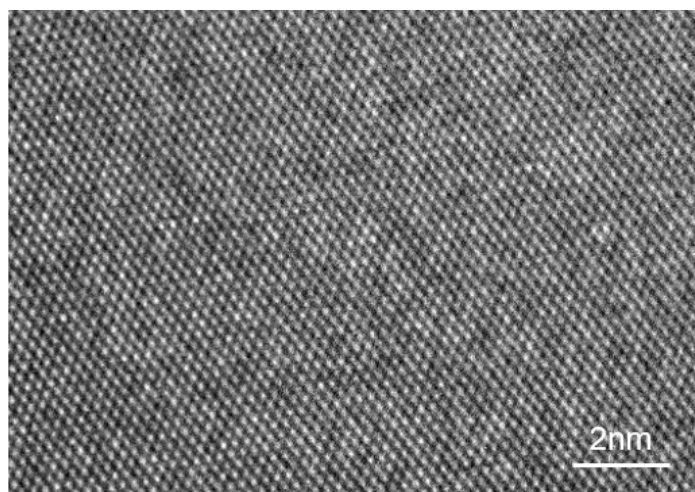

**Fig. S1.** High-resolution transmission electron microscope (HRTEM) image of the high-quality h-BN.

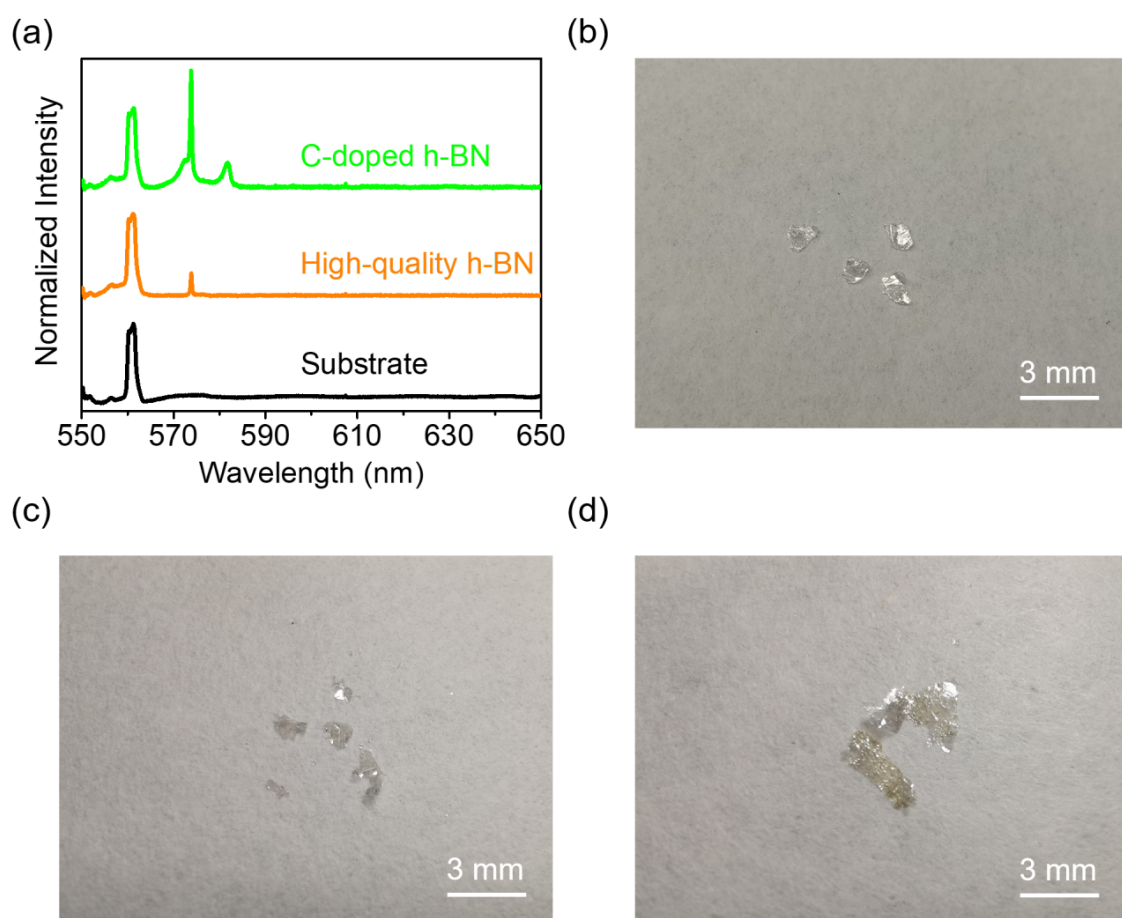

**Fig. S2.** (a) Photoluminescence (PL) characterization of carbon doped h-BN (C-h-BN) flakes, high-quality h-BN flakes and substrates. A single photon emission peak at 582 nm can be observed in the PL spectrum. Optical images of (b) high-quality h-BN crystals, (c) C-h-BN crystals, and (d) heavily C-doped h-BN crystals.

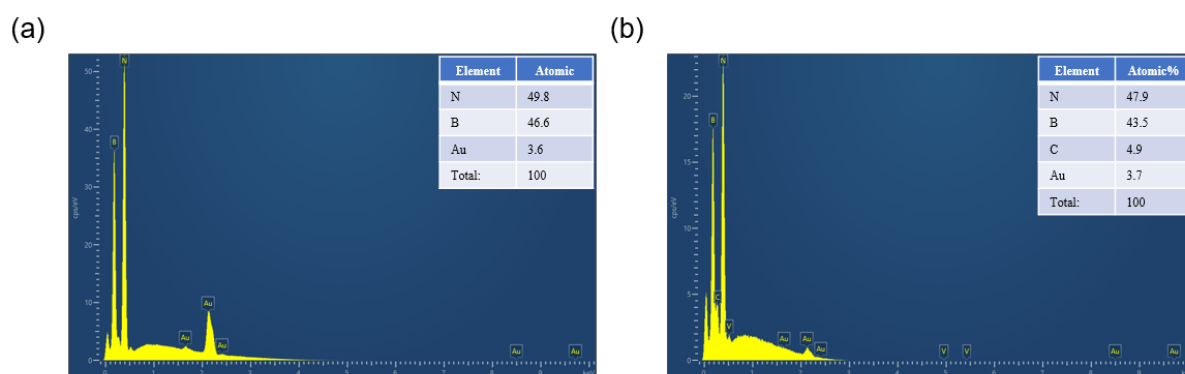

**Fig. S3.** Energy-dispersive X-ray spectroscopy (EDS) analysis of the high-quality (a) and carbon-doped (b) h-BN nanosheets. The ratio of B and N atoms is 0.94: 1 and 0.91: 1, respectively.

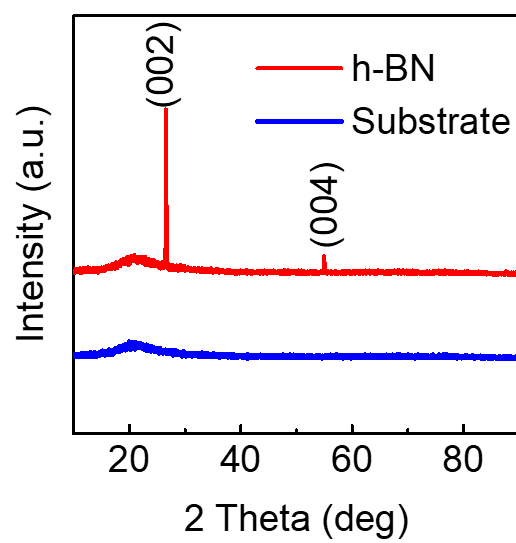

**Fig. S4.** X-ray diffraction (XRD) pattern of bulk C-h-BN crystal and glass substrate.

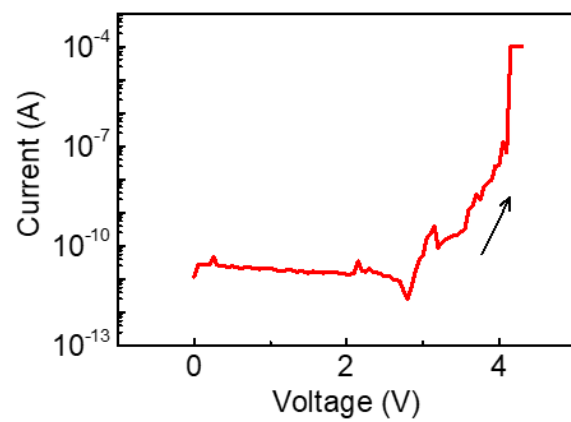

**Fig. S5.** Electroforming process of Au/C-h-BN/Au memristor. The current increased rapidly at a voltage of 4.2 V.

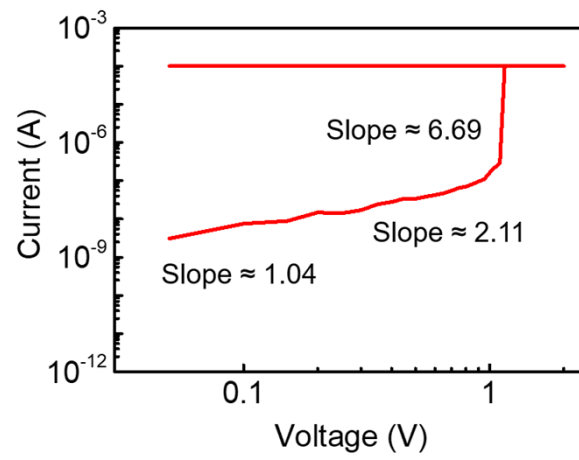

**Fig. S6.** The positive part of the I–V curve in Fig. 2c using double-logarithmic coordinates. The linear fitting of the curve displays three regions according to  $I \sim V^a$ :  $a \approx 1.04$ ,  $a \approx 2.11$  and  $a \approx 6.69$ .

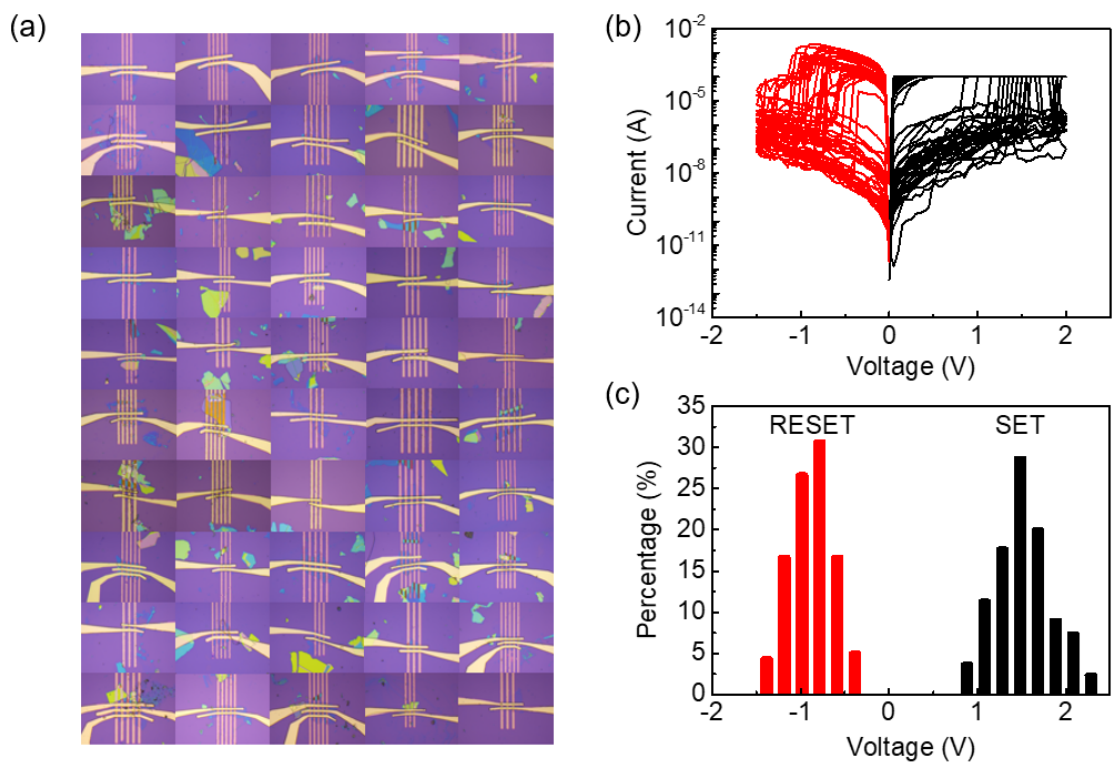

**Fig. S7.** (a) Optical images of 50 Au/h-BN/Au RRAM crossbar arrays. (b) I-V curves of 30 representative device. (c) Statistical distribution of SET and RESET voltages extracted from I-V curves of 300 Au/h-BN/Au RRAM devices in 50 crossbar arrays.



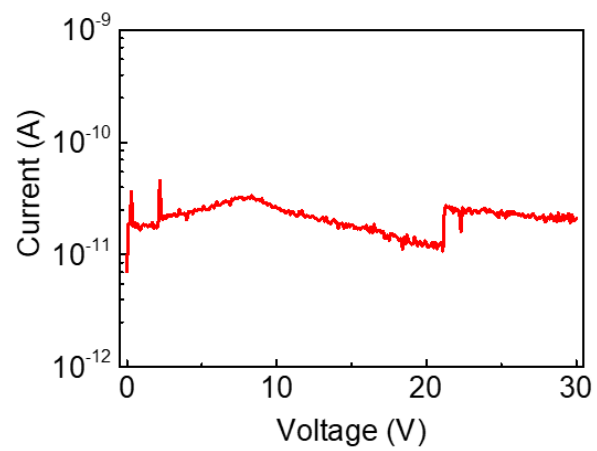

**Fig. S8.** I-V curve of Au/h-BN/Au device with high-quality h-BN as the resistance switching layer.

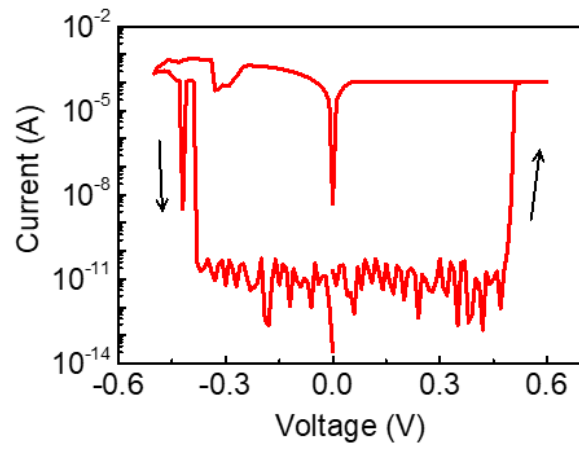

**Fig. S9.** I-V curve of Ag/C-h-BN/Au memristor device.

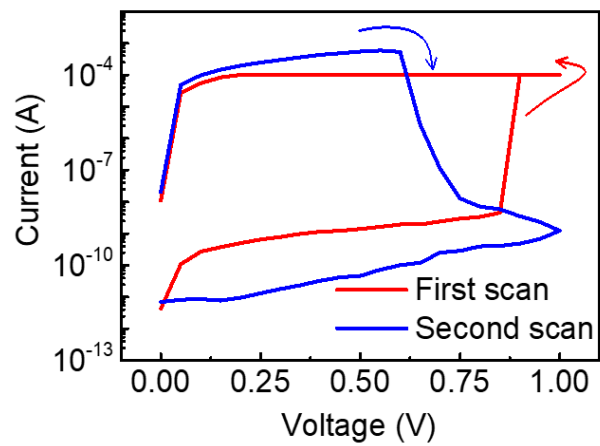

**Fig. S10.** Non-volatile unipolar I–V curves of the C-h-BN memristor devices.

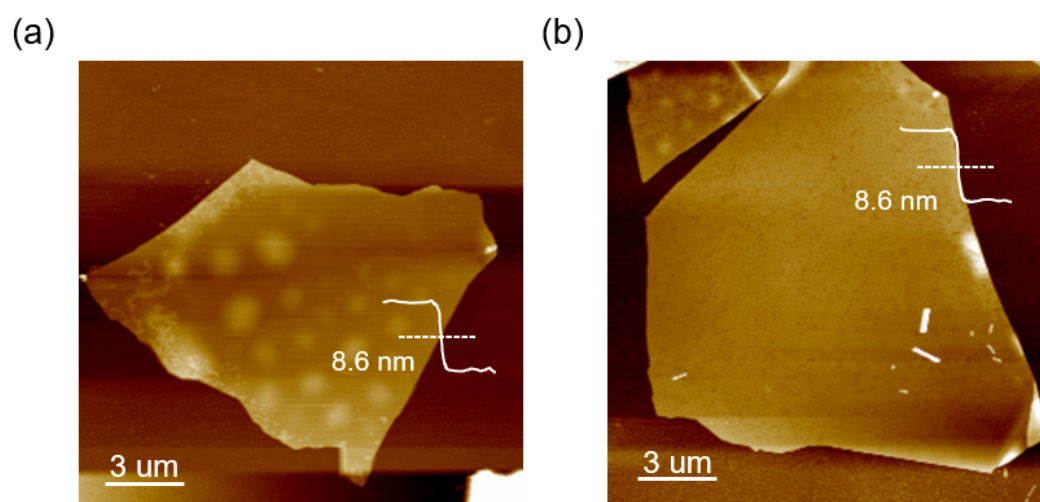

**Fig. S11.** The tapping mode AFM images of the mechanically exfoliated (a) C-h-BN and (b) high-quality h-BN flakes, respectively. Inset shows the height profile of the flake.
